# Supplementary material for: Nox4-dependent ROS modulation by amino endoperoxides to induce apoptosis in cancer cells
Source: PubMed Central journal article supplement — Cell Death Dis. 2013 Mar 21;4(3):e552–. doi: 10.1038/cddis.2013.68 (PMC3615744; doi:10.1038/cddis.2013.68), 2013-03-21
Supplement: cddis201368x1.pdf [file cddis201368x1.pdf]

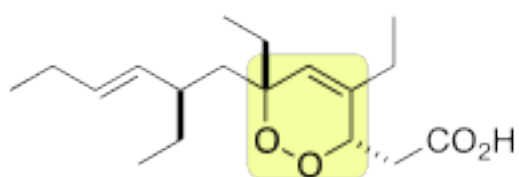

**Haterumadioxin A**  
(cytotoxicity  
against 38 human cancer cell lines)

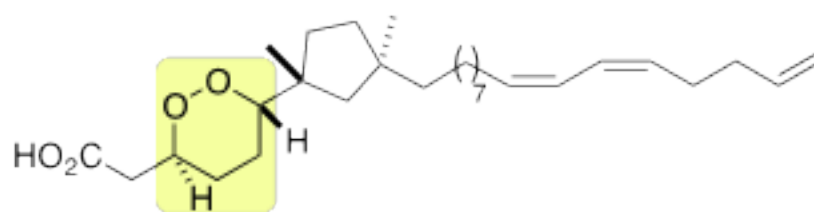

**Stolonic Acids A**  
(antiproliferative activity against  
human melanoma and ovarian tumor cell lines)

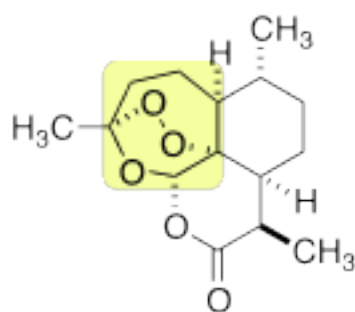

**Qinghaosu (Artemisinin)**  
(antimalarial activity)

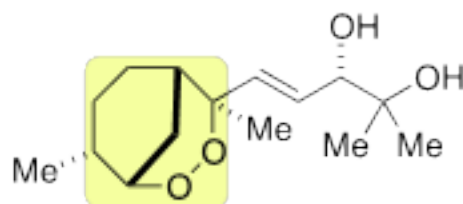

**Yingzhaosu A**  
(antimalarial activity)
