# Supplementary material for: Nox4-dependent ROS modulation by amino endoperoxides to induce apoptosis in cancer cells
Source: PubMed Central journal article supplement — Cell Death Dis. 2013 Mar 21;4(3):e552–. doi: 10.1038/cddis.2013.68 (PMC3615744; doi:10.1038/cddis.2013.68), 2013-03-21

**A** NADPH oxidase 4 [Homo sapiens]  
amino acids sequence

| N   | 11          | 21         | 31         | 41         |
|-----|-------------|------------|------------|------------|
| 1   | MAVSWRSWLA  | NEGVKHLCLF | IWLSMNVLLF | WKTFLLYNQG |
| 51  | GLGLCLSRAS  | ASVLNLNCSL | ILLPMCRTLL | AYLRGSQKVP |
| 101 | SRTFHITCGV  | TICIFSGVHV | AAHLVNALNF | SVNYSDFVE  |
| 151 | PRKLLFTTVP  | GLTGVCVVVV | LFLMITASTY | AIRVSNYDIF |
| 201 | YMLLTLHVSG  | GLLKYQTNLD | THPPGCISLN | RTSSQNISLP |
| 251 | FPEGFSPKPAE | FTQHKFKVIC | MEEPRFQANF | PQTWLWISGP |
| 301 | RYIRSNKPVV  | IISVISHPSD | VMEIRMVKEN | FKARPGQYIT |
| 351 | NHPFTLT MCP | TETKATFGVH | LKIVGDWTER | FRDLLLPSS  |
| 401 | SRNYPKLYID  | GPFGSPFEES | LNIEVSLCVA | GGIGVTPFAS |
| 451 | PYKLRRLYFI  | WVCRDIQSFR | WFADLLCMLH | NKFWQENRPD |
| 501 | TDGIQKIIGE  | KYHALNSRLF | IGRPRWKLFF | DEIAKYNRGK |
| 551 | SLSKTLHKLS  | NQNNSYGTRF | EYNKESFS   |            |

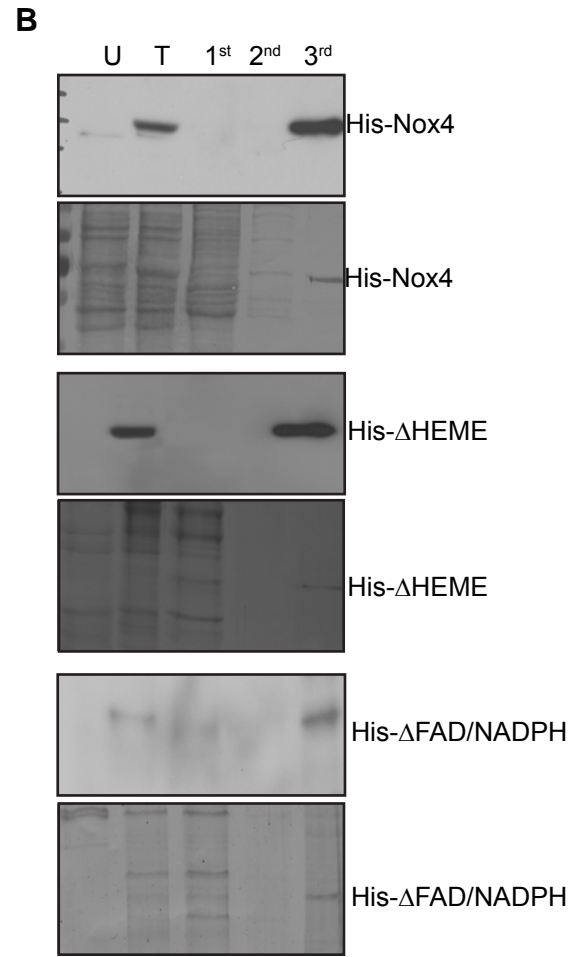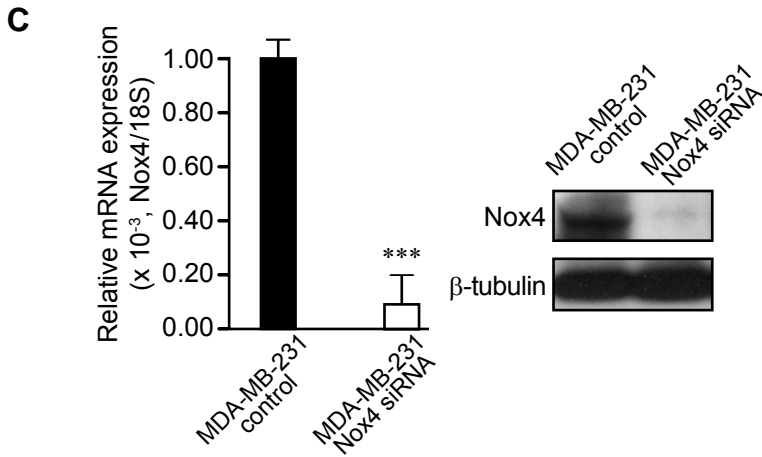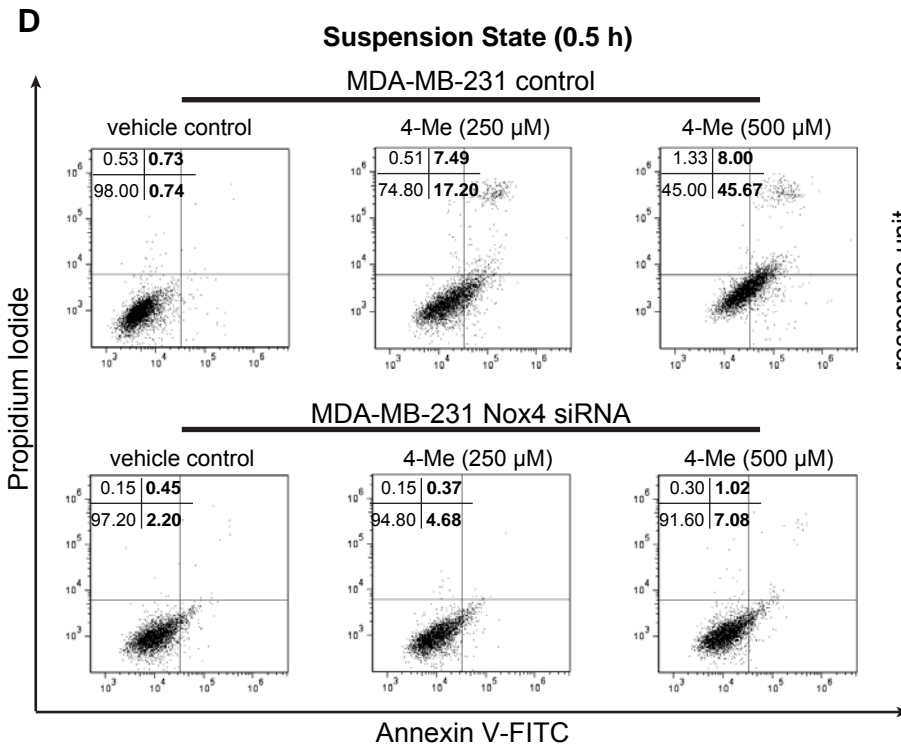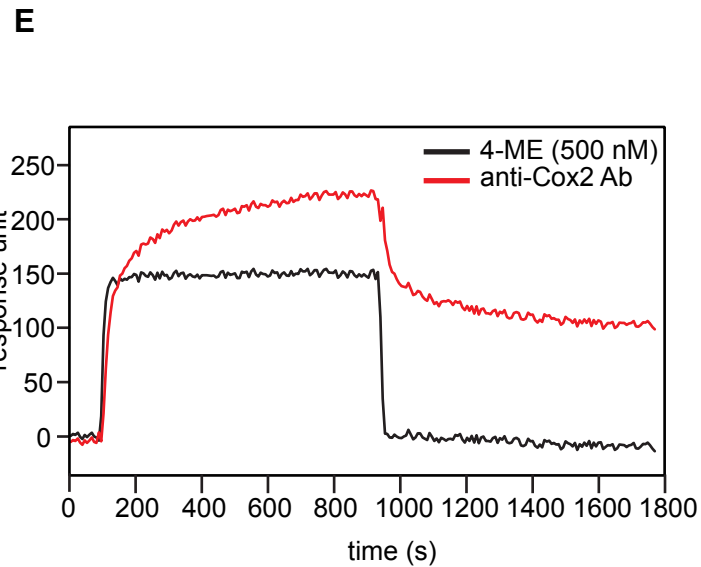

Supplement: cddis201368x6.pdf [file cddis201368x6.pdf]
