# Supplementary material for: Nox4-dependent ROS modulation by amino endoperoxides to induce apoptosis in cancer cells
Source: PubMed Central journal article supplement — Cell Death Dis. 2013 Mar 21;4(3):e552–. doi: 10.1038/cddis.2013.68 (PMC3615744; doi:10.1038/cddis.2013.68), 2013-03-21

**A Suspension State (0.5 h)**

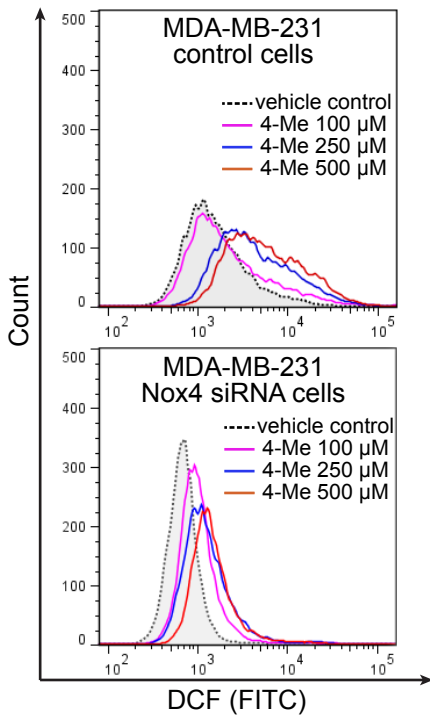

**B**

**General ROS level (DCF) Suspension State (0.5 h)**

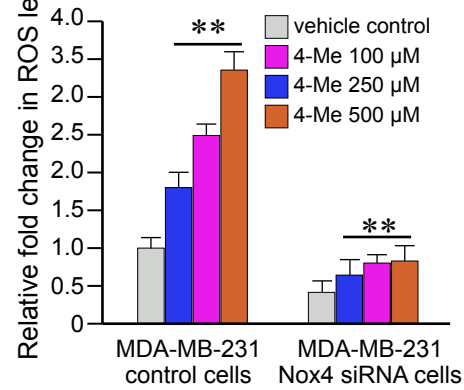

**C**

**H<sub>2</sub>O<sub>2</sub> level Suspension State (0.5 h)**

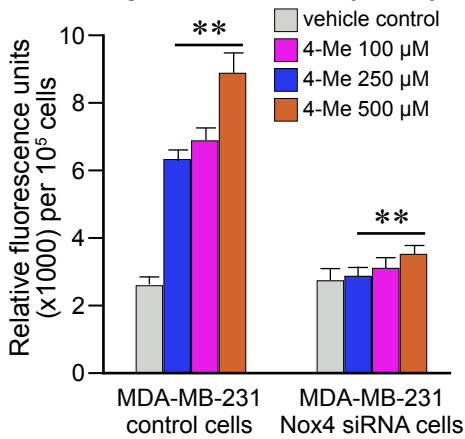

**D**

**O<sub>2</sub><sup>-</sup> level Suspension State (0.5 h)**

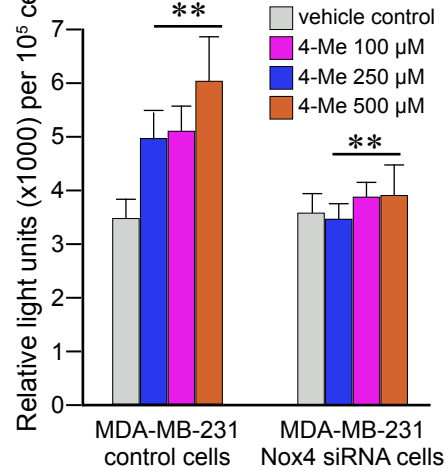

**E**

**O<sub>2</sub><sup>-</sup>:H<sub>2</sub>O<sub>2</sub> ratio change**

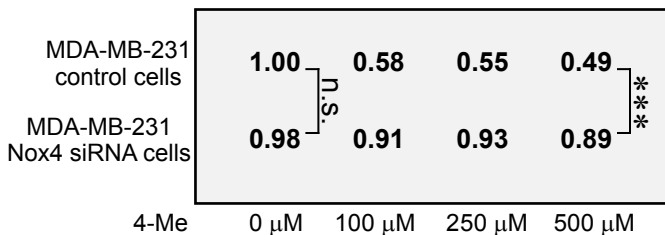

**F**

**·OH level Suspension State (0.5 h)**

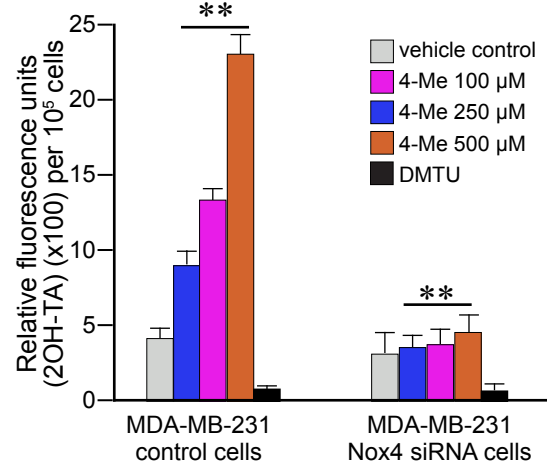

Supplement: cddis201368x9.pdf [file cddis201368x9.pdf]
