# Supplementary figures and images for: Nox4-dependent ROS modulation by amino endoperoxides to induce apoptosis in cancer cells
Source: PubMed Central journal article supplement — Cell Death Dis. 2013 Mar 21;4(3):e552–. doi: 10.1038/cddis.2013.68 (PMC3615744; doi:10.1038/cddis.2013.68), 2013-03-21

**A**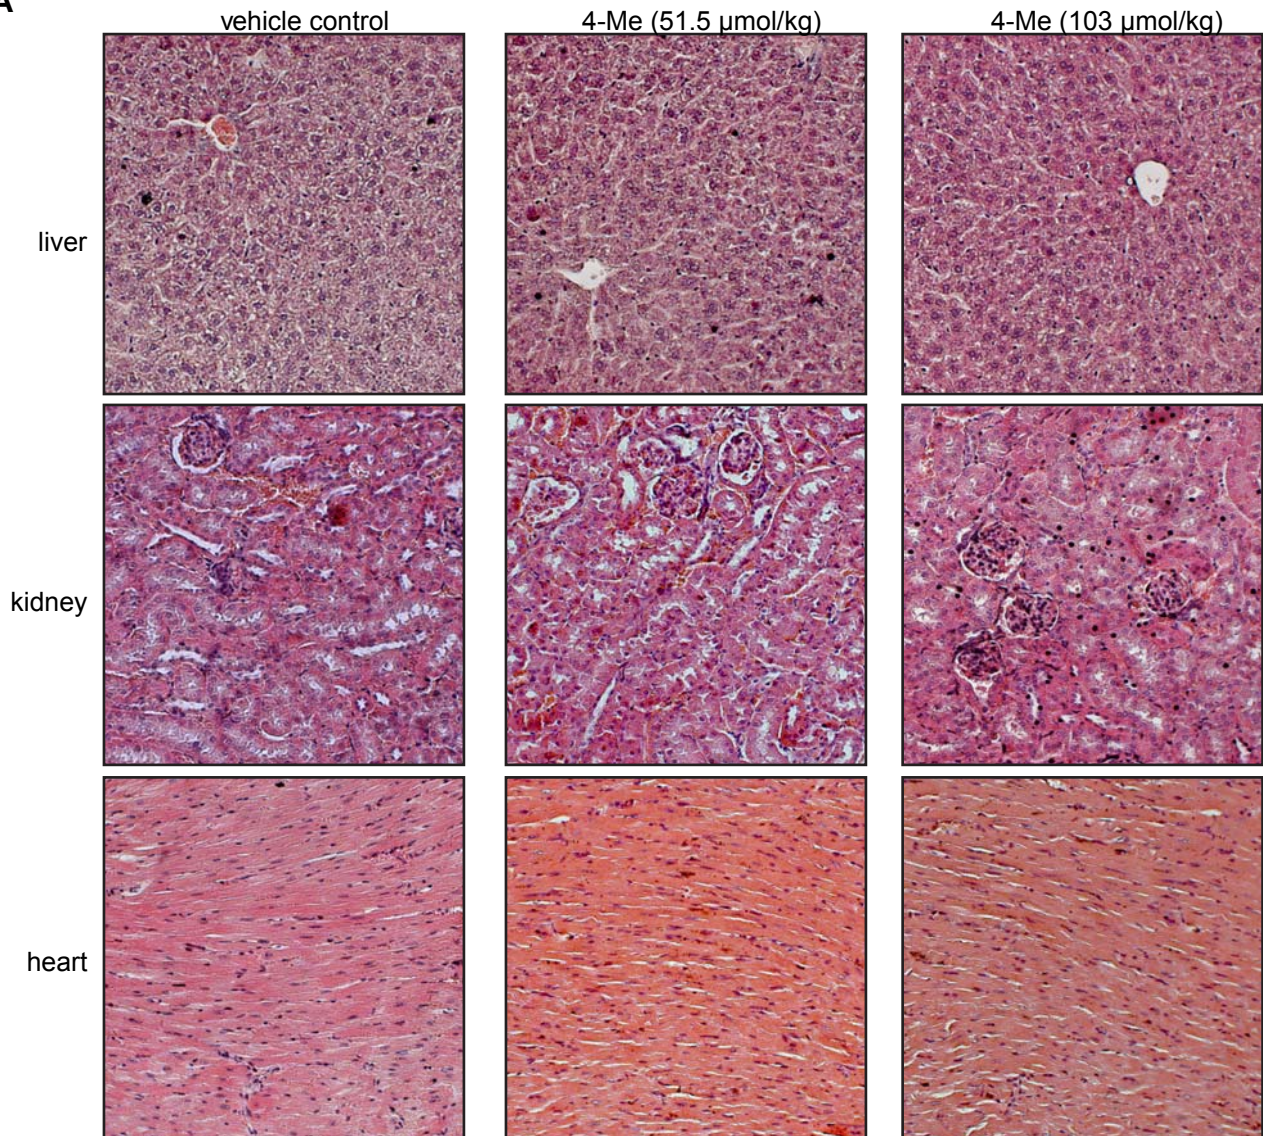**B**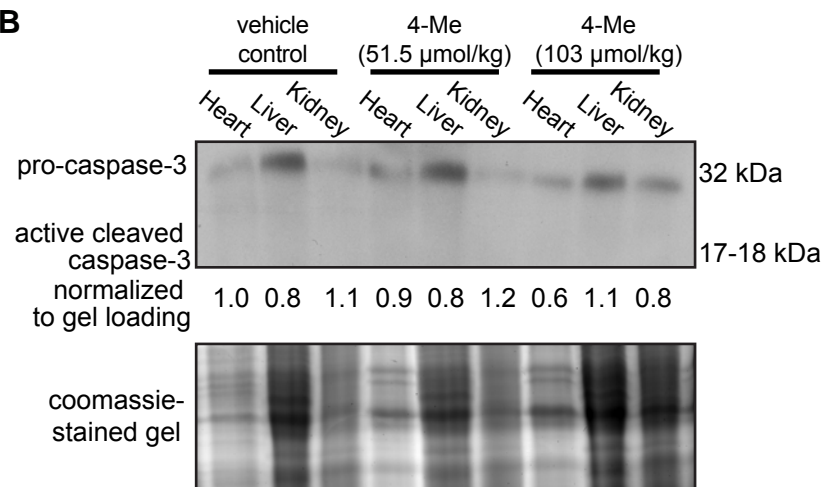

Supplement: cddis201368x10.pdf [file cddis201368x10.pdf]

A

**MDA-MB-231**  
**Drug Treatment under Adherent State (0.5 h)**

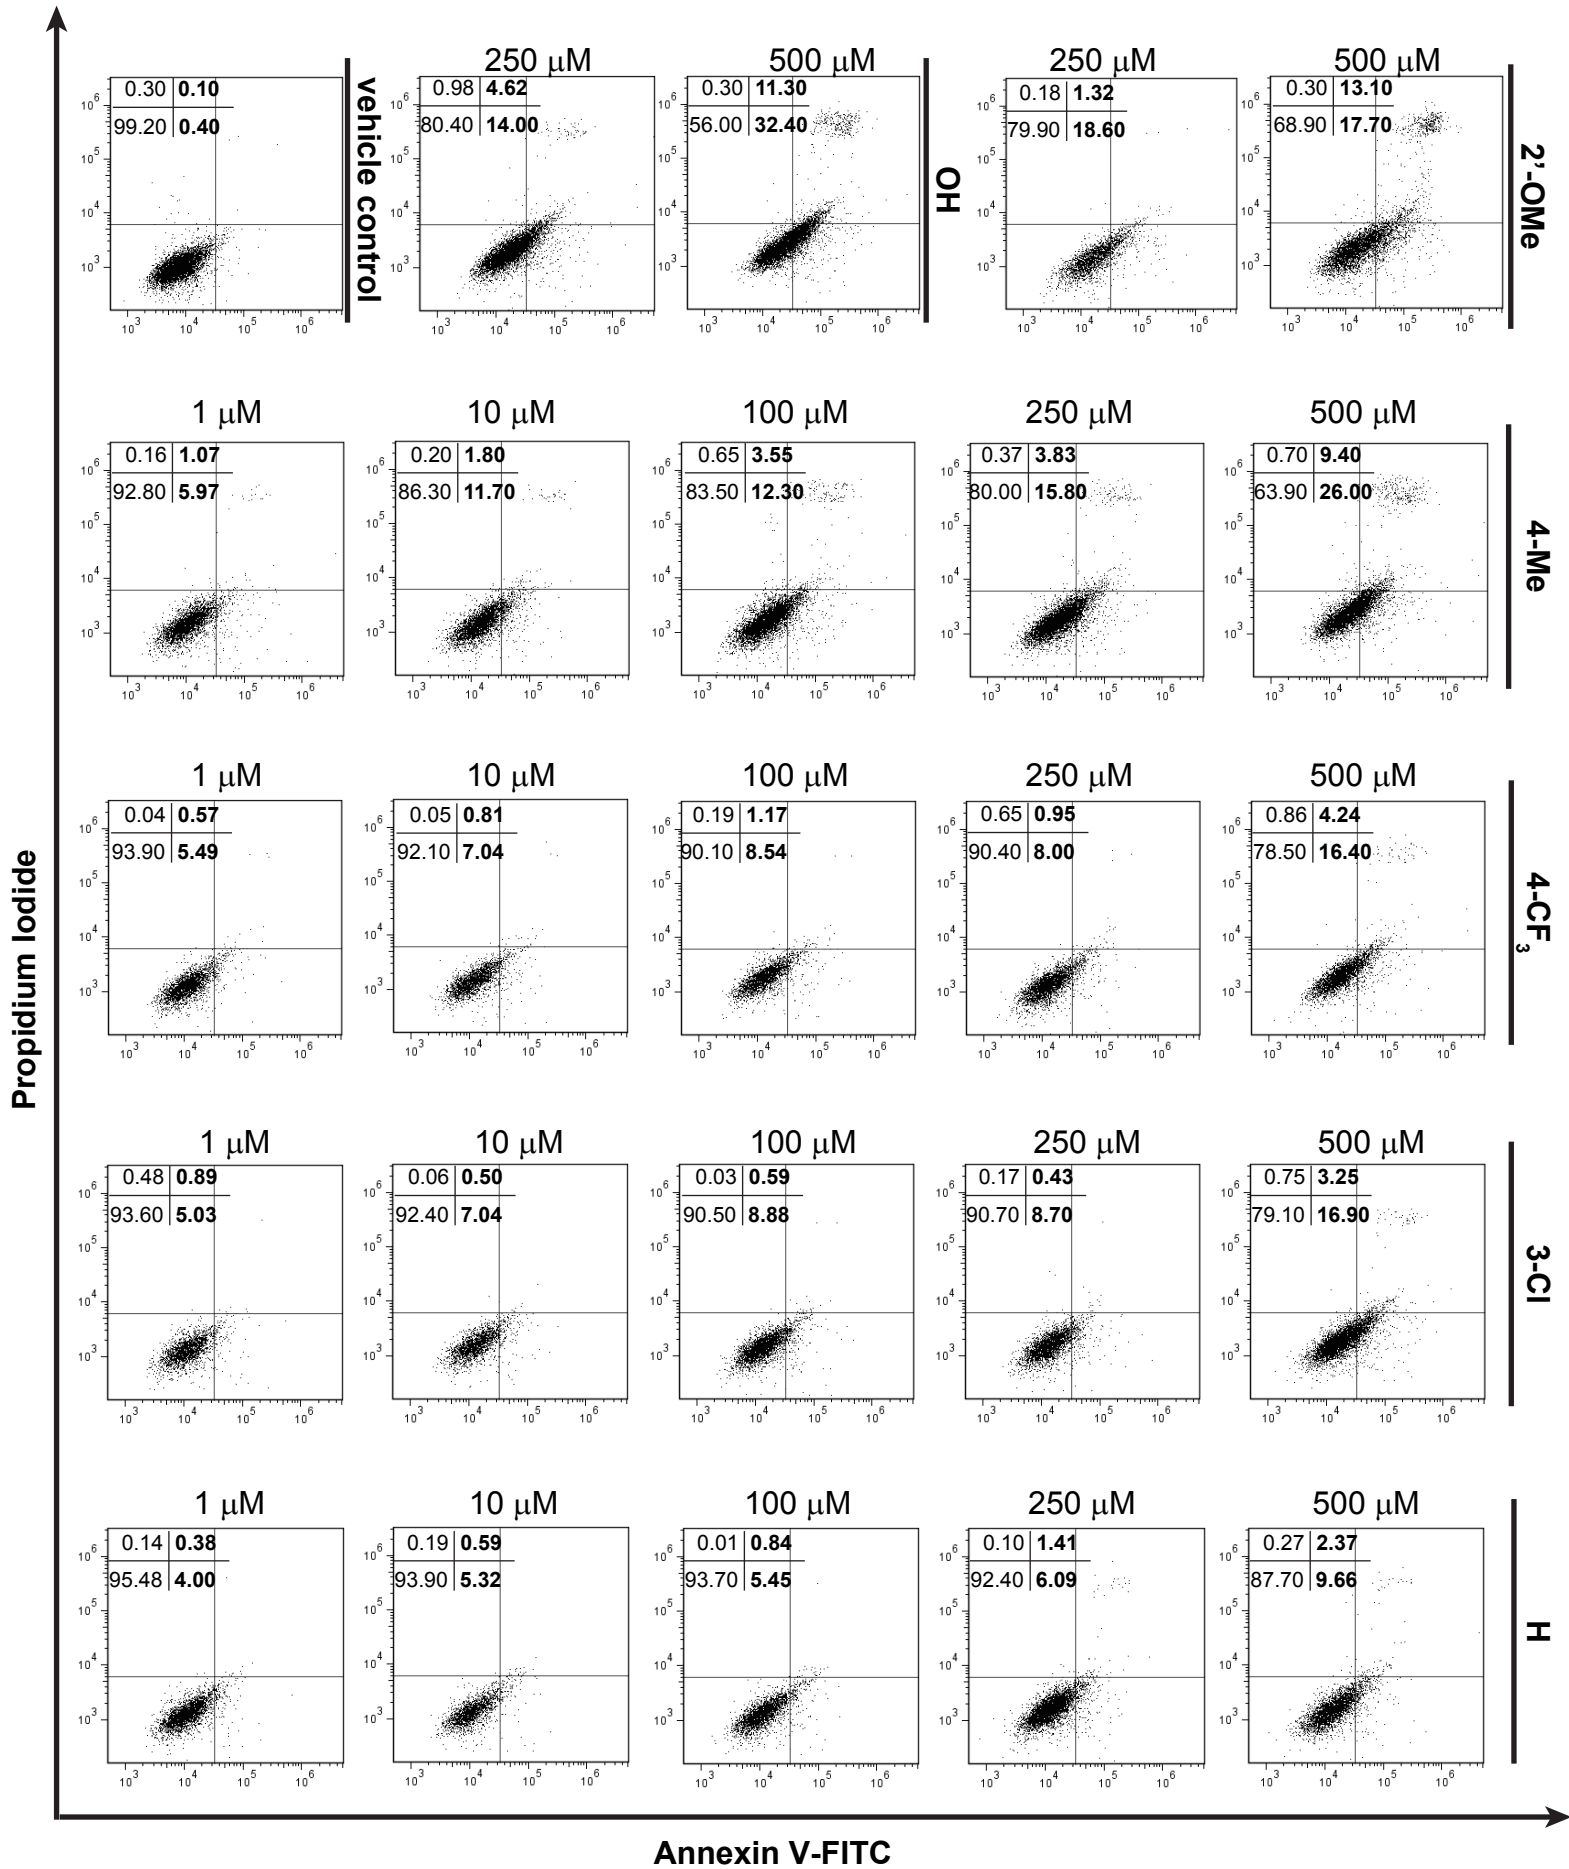

Supplement: cddis201368x2.pdf [file cddis201368x2.pdf]

B

MCF10A  
Drug Treatment (500  $\mu$ M for 0.5 h)

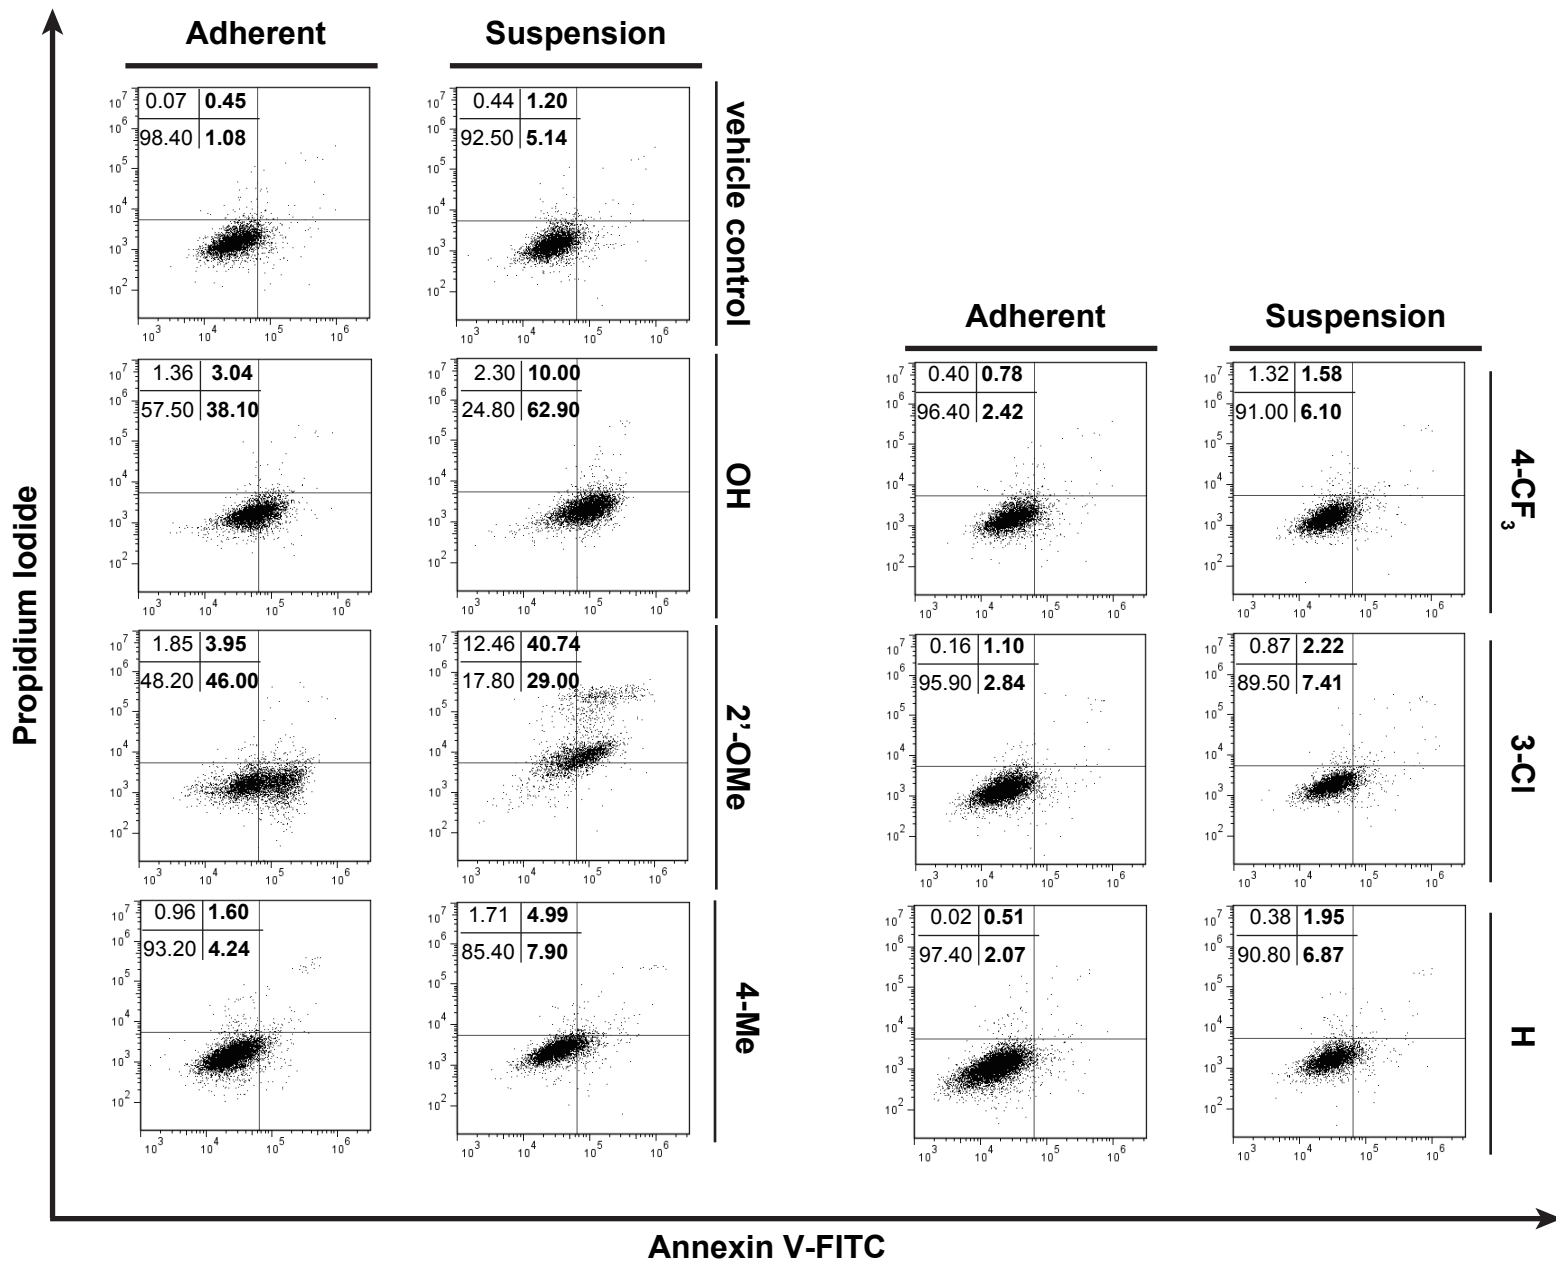

Supplement: cddis201368x3.pdf [file cddis201368x3.pdf]

C

**MDA-MB-231**  
**Drug Treatment under Suspension State (0.5 h)**

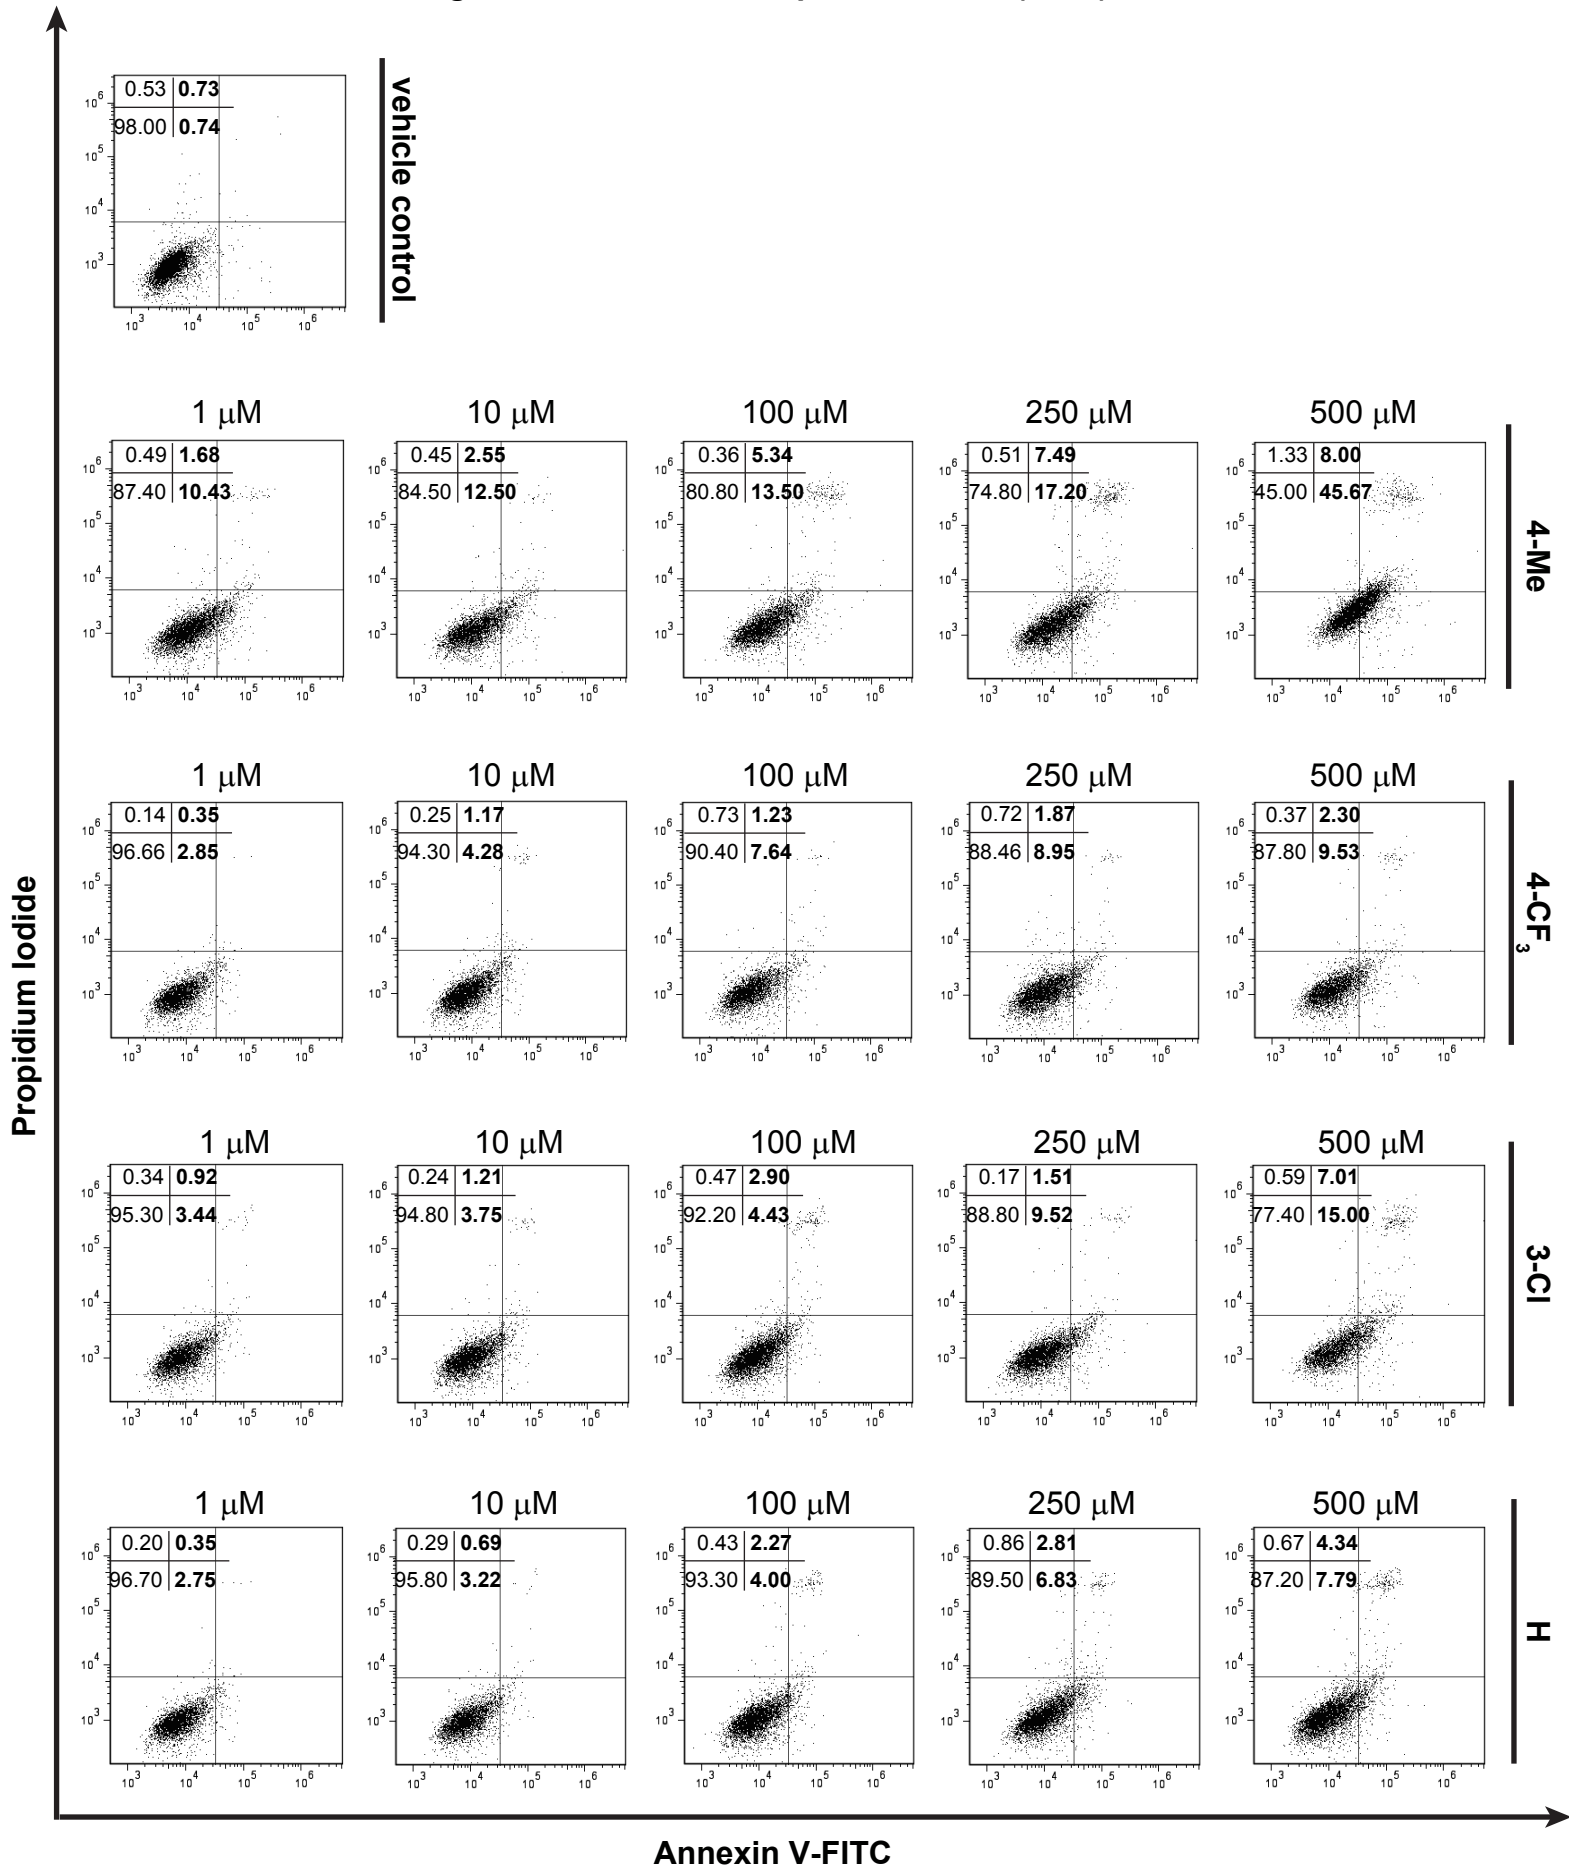

Supplement: cddis201368x4.pdf [file cddis201368x4.pdf]

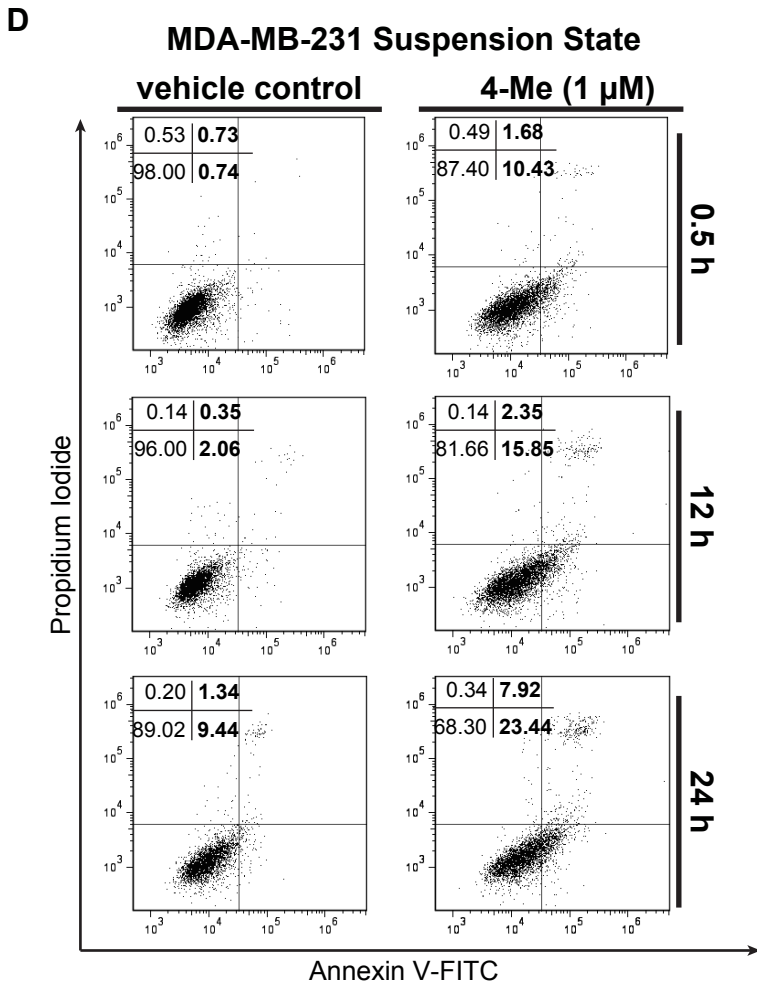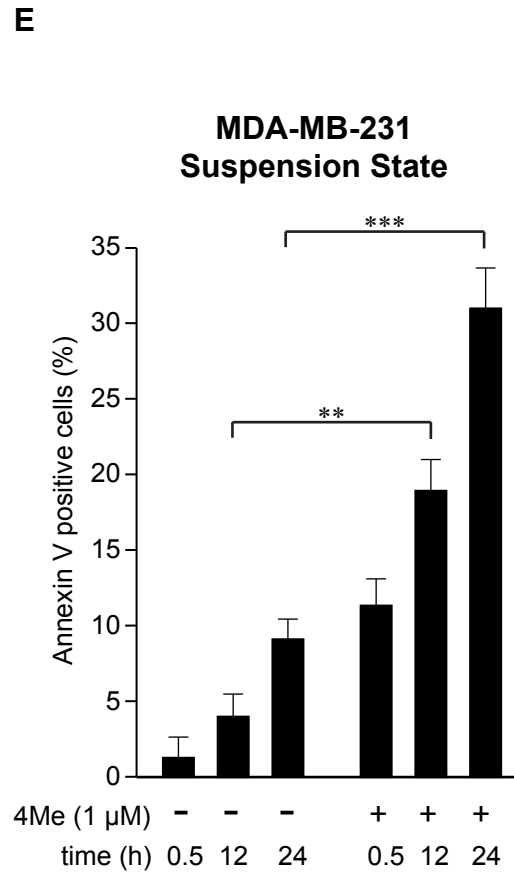

Supplement: cddis201368x5.pdf [file cddis201368x5.pdf]

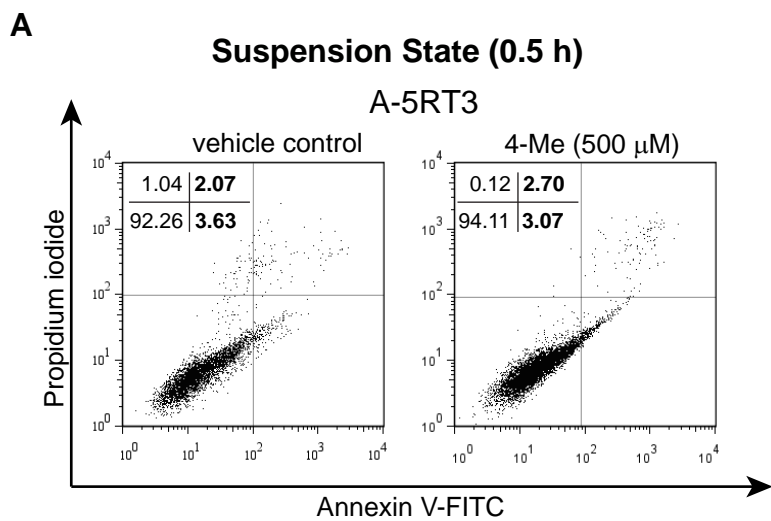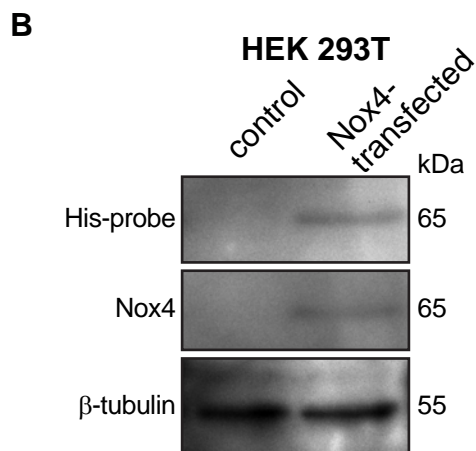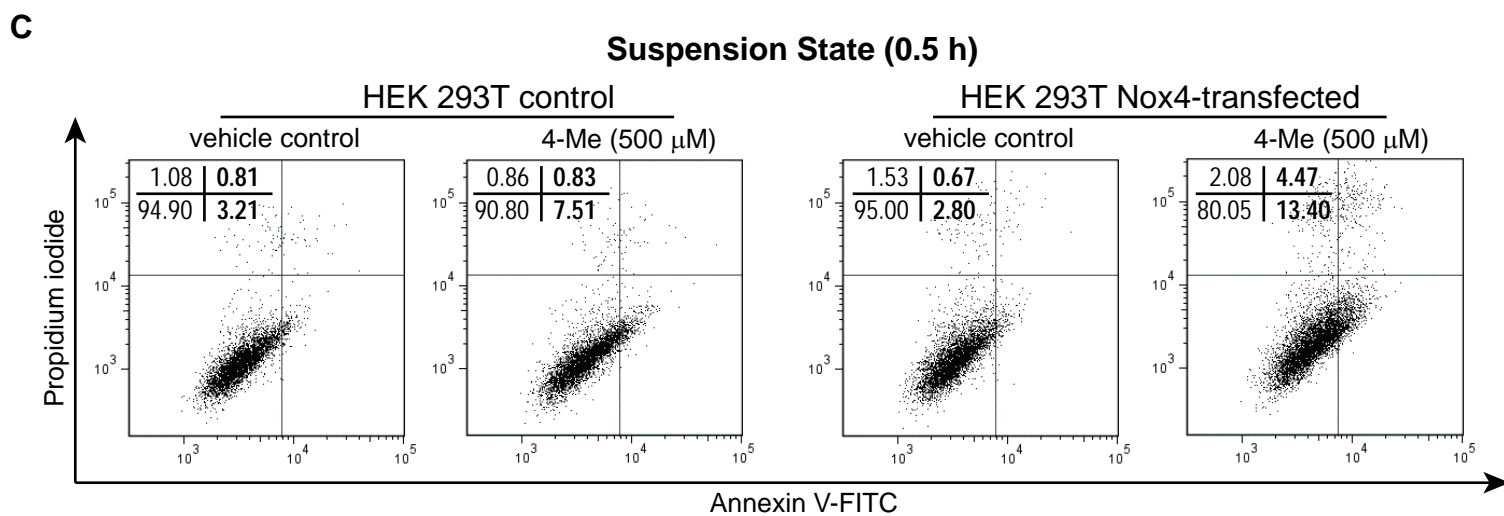

Supplement: cddis201368x7.pdf [file cddis201368x7.pdf]

**A**

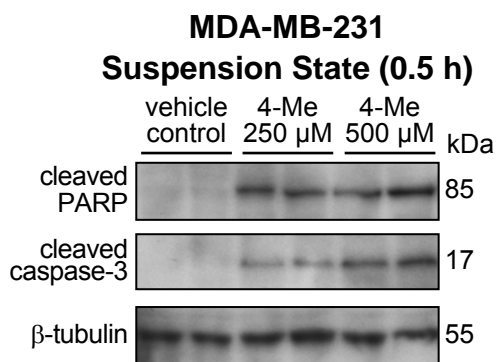

**B**

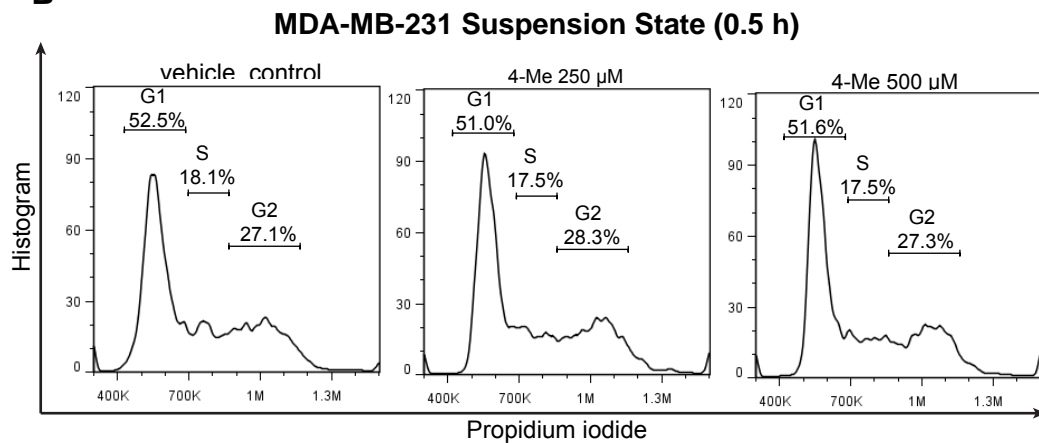

**C**

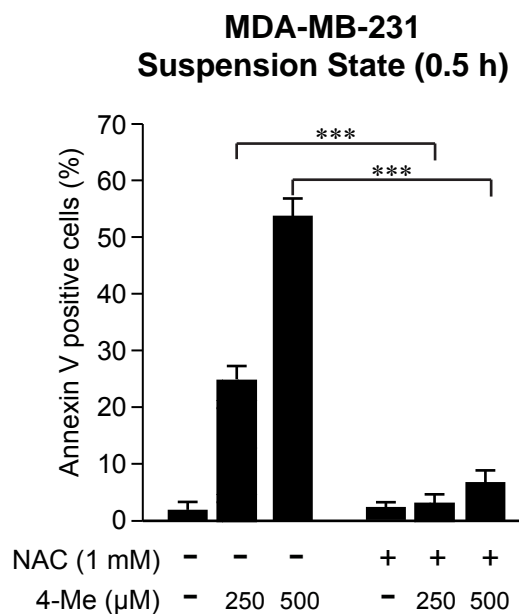

**D**

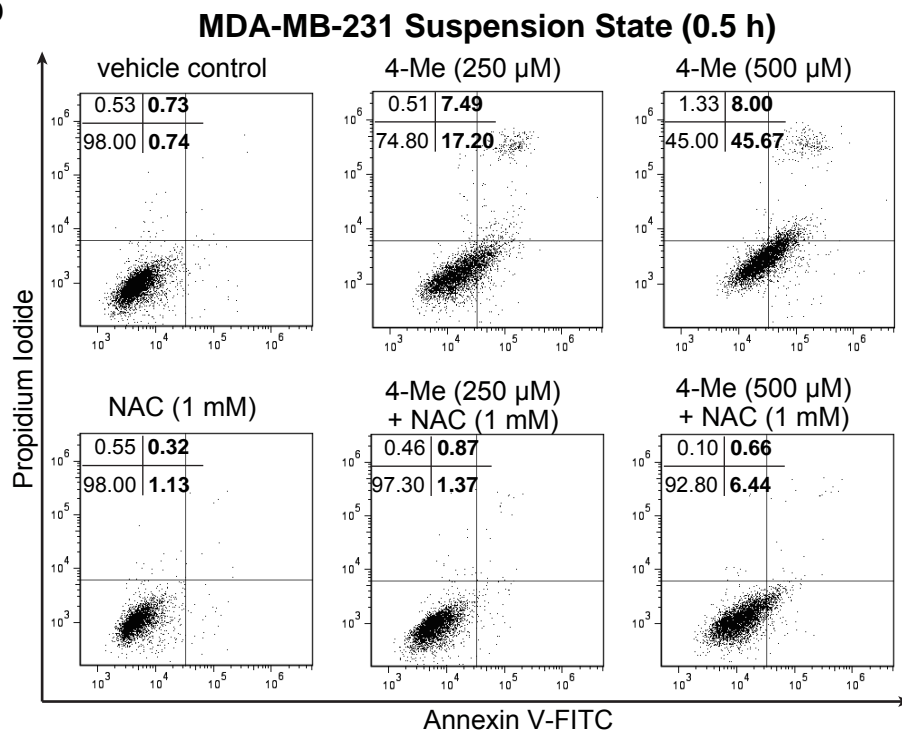

Supplement: cddis201368x8.pdf [file cddis201368x8.pdf]
